# Supplementary material
Source: Springer Nature journal article supplement (https://www.springermedizin.de/resource/supplementary/13049_2012_553_MOESM1_ESM.pdf/9666808)

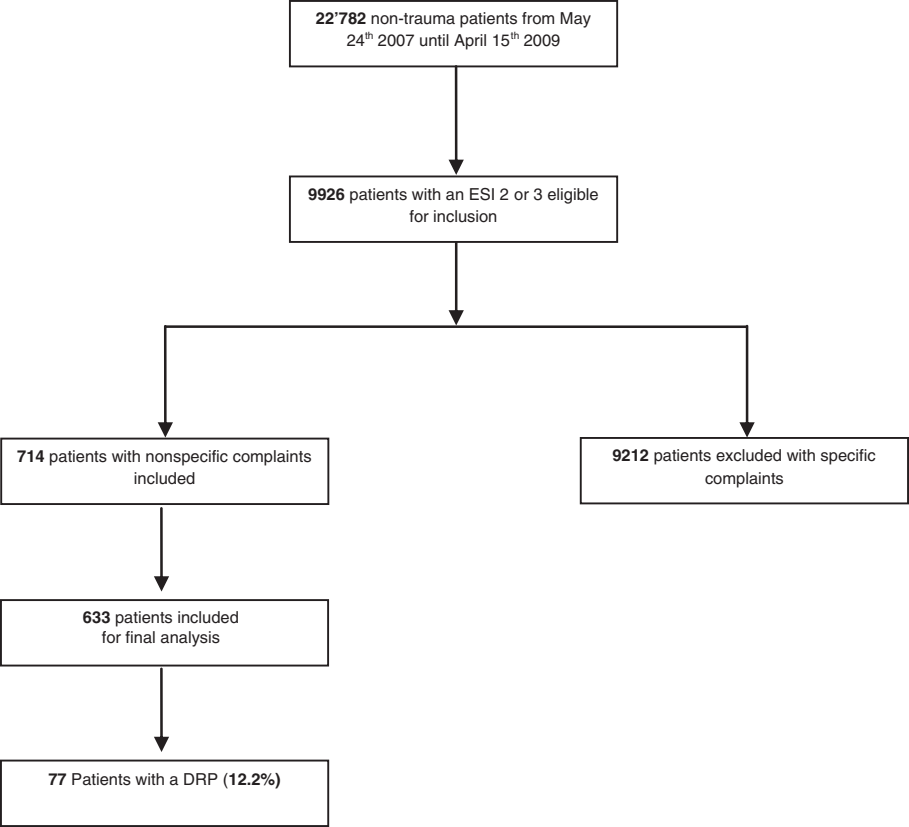

Supplement: MOESM1 [file 9666808]
